# Supplementary material
Source: PubMed Central journal article supplement (PMC4253140)
Supplement: NIHMS638536-supplement-2.pdf [file NIHMS638536-supplement-2.pdf]

## I. SUPPLEMENTAL FIGURES AND MOVIES

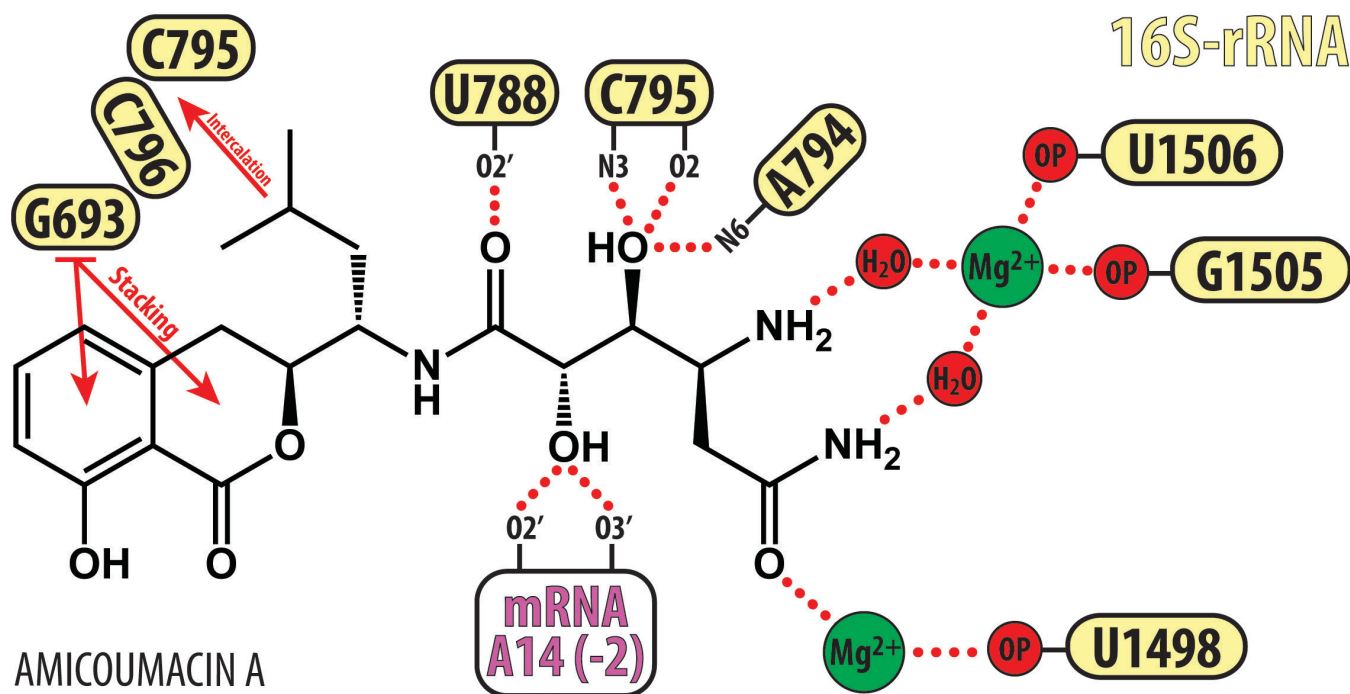

**Figure S1, related to Figure 2. Schematic overview of AMI interactions on the ribosome.** Nucleotides of the 16S rRNA are highlighted light yellow, mRNA is magenta. H-bonds and coordination bonds are shown as red dots. Hydrophobic interactions, such as stacking or intercalation, are displayed as red arrows. Non-bridging phosphate oxygens (OP) and magnesium-coordinated waters are colored red, while magnesium ions are shown green.
