# Supplementary material
Source: PubMed Central journal article supplement (PMC4253140)
Supplement: NIHMS638536-supplement-3.pdf [file NIHMS638536-supplement-3.pdf]

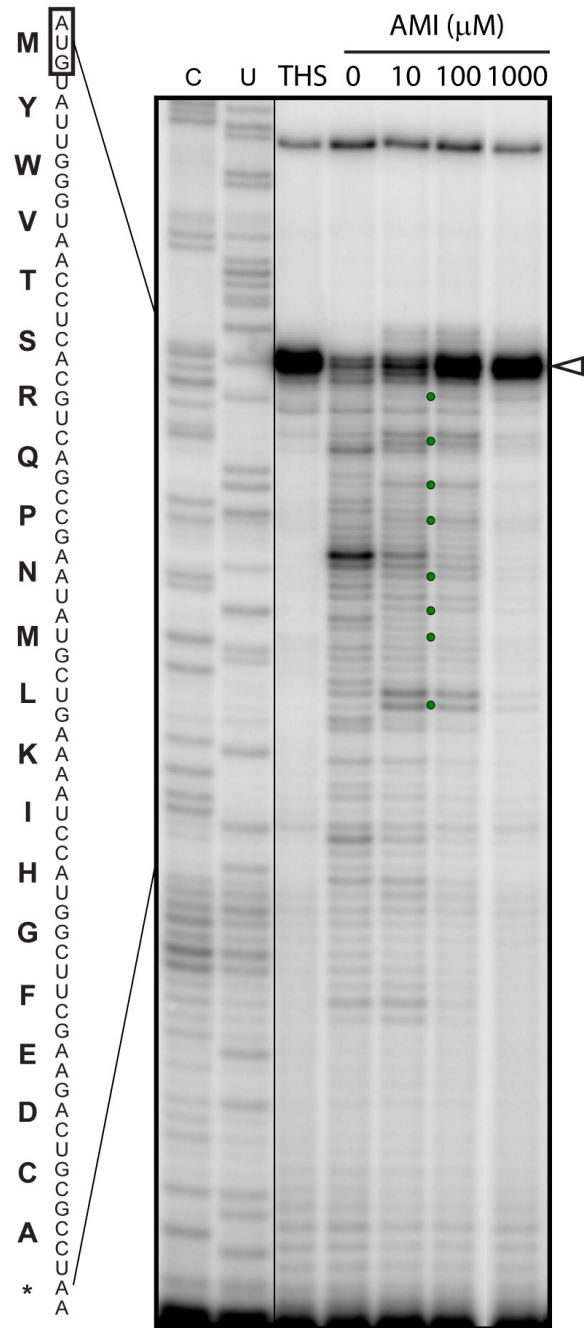

**Figure S2, related to Figure 3. AMI is an elongation inhibitor that can act past initiation.** Toe-printing analysis of translation of the synthetic 21-codon mRNA RST1 (Orelle et al., 2013) in the presence of increasing concentrations of AMI. Thiostrepton (THS), added to the reaction at 50 mM concentration, arrests the ribosome at the initiator codon (the corresponding toe-printing band is indicated by a white triangle). The toe-printing bands, which appear at lower concentrations of AMI and which reflect inhibition of translation elongation by AMI at the internal codons of the *RST1* gene, are indicated by green dots.
